# Supplementary material for: Defining the Most Potent Osteoinductive Culture Conditions for MC3T3-E1 Cells Reveals No Implication of Oxidative Stress or Energy Metabolism
Source: MDPI journal article supplement (doi:10.3390/ijms25084180), 2024-04-10
Supplement: s1 [file s1]

**Table S1:** Sequences of the primers used for qPCR.

| Gene          | Primer sequences                                                                |
|---------------|---------------------------------------------------------------------------------|
| <i>Alpl</i>   | Forward: 5'-CCTTGAAAAATGCCCTGAAA-3'<br>Reverse: 5'-CTTGAGAGAGCCACAAAGG-3'       |
| <i>Col1a1</i> | Forward: 5'-TGGCCCCATTGGTAACGTTGGT-3'<br>Reverse: 5'-AGGACCTTGTTTGCCGGGTTC-3'   |
| <i>Runx2</i>  | Forward: 5'-TCTGCCGAGCTACGAAATGCCT-3'<br>Reverse: 5'-TGAAACTCTTGCCTCGTCCGCT-3'  |
| <i>Bglap</i>  | Forward: 5'-CATGAGGACCCTCTCTCTGC-3'<br>Reverse: 5'-TGGACATGAAGGCTTTGTCA-3'      |
| <i>Pgc1a</i>  | Forward: 5'-GACAGGTGCCTTCAGTTCAC-3'<br>Reverse: 5'-CAACCAGAGCAGCACACTCTA-3'     |
| <i>Sod2</i>   | Forward: 5'-TTAACGCGCAGATCATGCA-3'<br>Reverse: 5'-GGTGGCGTTGAGATTGTTCA-3'       |
| <i>Tfam</i>   | Forward: 5'-CATAGGCACCGTATTGCGTG-3'<br>Reverse: 5'-TCGGAATACAGACAAGACTGATAGA-3' |
| <i>Actb</i>   | Forward: 5'-GCCCTGAGGCTCTTTTCCAG-3'<br>Reverse: 5'-TGCCACAGGATTCCATACCC-3'      |
